# Supplementary material for: DOACs in Budd-Chiari syndrome: A real-world comparison from the TriNetX Global Collaborative Network
Source: Research Square preprint supplement (doi:10.21203/rs.3.rs-6481491/v1), 2025-09-22
Supplement: Supplementary file 1 [file 84058ce312d5eb3ae211f847.docx]

# Supplement 1. ICD-10 and CPT Codes Used for Patient Identification and Study Criteria

| Category | Condition/Procedure | Code Type | Code | Description |
| --- | --- | --- | --- | --- |
| Inclusion Criteria | Budd-Chiari Syndrome | ICD-10 | I82.0 | Budd-Chiari syndrome |
| Inclusion Criteria | Age ≥18 | – | – | Filter applied within TriNetX; no specific ICD-10 |
| Exclusion Criteria | Deep Vein Thrombosis (DVT) | ICD-10 | I82.4 | Acute embolism and thrombosis of deep veins of lower extremity |
| Exclusion Criteria | Pulmonary Embolism (PE) | ICD-10 | I26.9 | Pulmonary embolism, unspecified |
| Exclusion Criteria | Other systemic thromboses | ICD-10 | I81, I82.1, I82.2 | Portal vein thrombosis, embolism and thrombosis of vena cava, renal vein |
| Exclusion Criteria | Platelet count <50,000/µL | – | – | Lab filter in TriNetX |
| Exclusion Criteria | Positive β-hCG >25 mIU/mL | – | – | Lab filter in TriNetX |
| Exclusion Criteria | End Stage Renal Disease (ESRD) | ICD-10 | N18.6 | End stage renal disease |
| Exclusion Criteria | Hepatobiliary cancer | ICD-10 | C22.0, C22.1, C23, C24 | Liver cell carcinoma, intrahepatic bile duct carcinoma, gallbladder, and biliary tract cancers |
| Exposure Criteria | Warfarin use | RXNORM/Drug Code | 11289 | Warfarin sodium |
| Exposure Criteria | DOACs (Apixaban) | RXNORM/Drug Code | 1367383 | Apixaban |
| Exposure Criteria | DOACs (Rivaroxaban) | RXNORM/Drug Code | 1116458 | Rivaroxaban |
| Exposure Criteria | DOACs (Dabigatran) | RXNORM/Drug Code | 1049630 | Dabigatran etexilate |
| Exposure Criteria | DOACs (Edoxaban) | RXNORM/Drug Code | 1508222 | Edoxaban tosylate |
| Covariates for Matching | Hypertension | ICD-10 | I10 | Essential (primary) hypertension |
| Covariates for Matching | Diabetes Mellitus | ICD-10 | E11 | Type 2 diabetes mellitus |
| Covariates for Matching | Heart Failure | ICD-10 | I50 | Heart failure |
| Covariates for Matching | COPD | ICD-10 | J44.9 | Chronic obstructive pulmonary disease, unspecified |
| Covariates for Matching | Coronary Artery Disease | ICD-10 | I25.10 | Atherosclerotic heart disease of native coronary artery |
| Covariates for Matching | Alcohol Use | ICD-10 | F10.10 | Alcohol abuse, uncomplicated |
| Covariates for Matching | Tobacco Use | ICD-10 | Z72.0 | Tobacco use |
| Covariates for Matching | Aspirin use | RXNORM | 1191 | Aspirin |
| Covariates for Matching | Clopidogrel use | RXNORM | 855332 | Clopidogrel |
| Outcomes | GI Bleeding | ICD-10 | K92.2 | Gastrointestinal hemorrhage, unspecified |
| Outcomes | Esophageal Bleeding | ICD-10 | I85.01 | Bleeding esophageal varices with bleeding |
| Outcomes | Intracranial Hemorrhage | ICD-10 | I61.9 | Intracerebral hemorrhage, unspecified |
| Outcomes | SBP | ICD-10 | K65.2 | Spontaneous bacterial peritonitis |
| Outcomes | TIPS procedure | CPT | 37182 | Transjugular intrahepatic portosystemic shunt (TIPS) |
| Outcomes | Mortality | – | – | Derived outcome from EMR mortality data |
